# Supplementary material
Source: publisher figshare collection journal article supplement (https://karger.figshare.com/ndownloader/files/13627982)
Supplement: Supplementary file 1 [file 13627982]

## **Supplementary Material**

# **Osteogenic Effect of Inducible Nitric Oxide Synthase (iNOS)-Loaded Mineralized Nanoparticles on Embryonic Stem Cells**

Jin-Sun Lee   Hong Jae Lee   Jae Won Lee   Sang Cheon Lee   Jung Sun Heo

Department of Maxillofacial Biomedical Engineering and Institute of Oral Biology, School of Dentistry, Kyung Hee University, Seoul, South Korea

Fig. S1. Molecular functions of differentially expressed genes in the cells cultured with iNOS-MNPs. The molecular functions of regulated genes in the cells cultured with iNOS-MNPs were analyzed by ClueGO: functionally grouped network with terms as nodes linked, and functionally related groups partially overlap; the node size represents the term enrichment significance. Only significant term labels per group are shown.

Fig. S2. Functionally enriched KEGG pathways identified by ClueGO. (A) The size of the nodes reflects significance of the term. Network includes genes that are shared between different KEGG pathways (B) Chart represents significant KEGG pathways where bars show numbers of genes associated with each term. *P* values for terms is marked using an asterix (\*) if the terms are significant ( $0.001 < P \text{ value} < 0.05$ ).

Supplemental data 1. List of all differentially expressed genes and GO term data. A fold-change cut-off of  $>1.5$  and a *P* value of  $<0.05$  was applied to filter genes that were differentially regulated by iNOS-MNPs treatment compared to the control.

Supplemental data 2. Lists of differentially expressed genes used to identify the activation of bone-related molecular pathways induced by iNOS-MNP treatment ( $P < 0.05$ , with fold-change  $>1.5$ ).

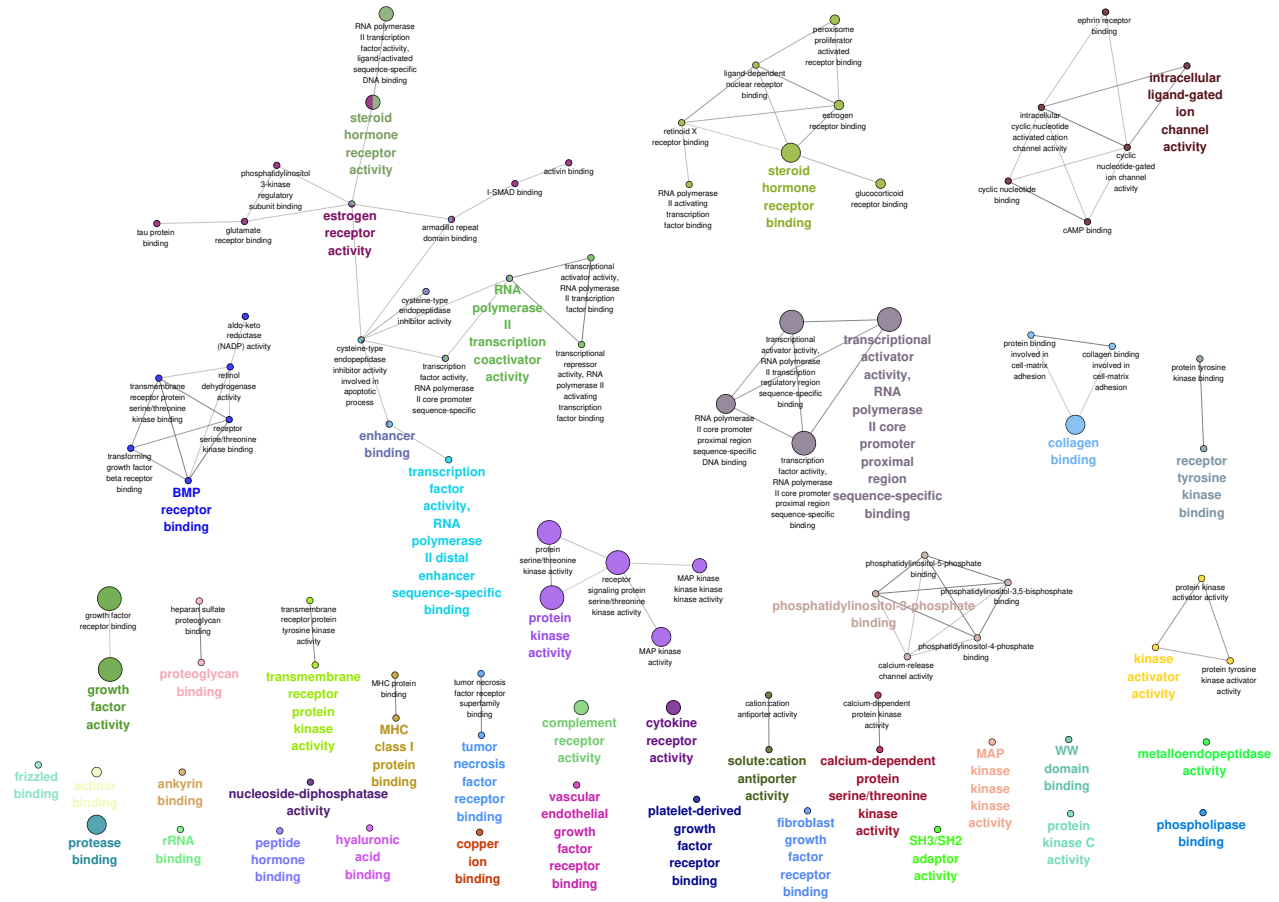

Figure S1

**A**

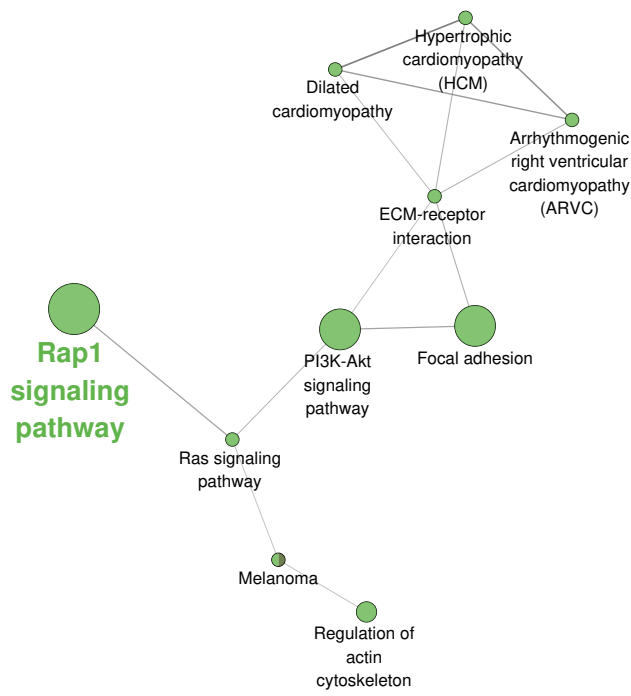

**B**

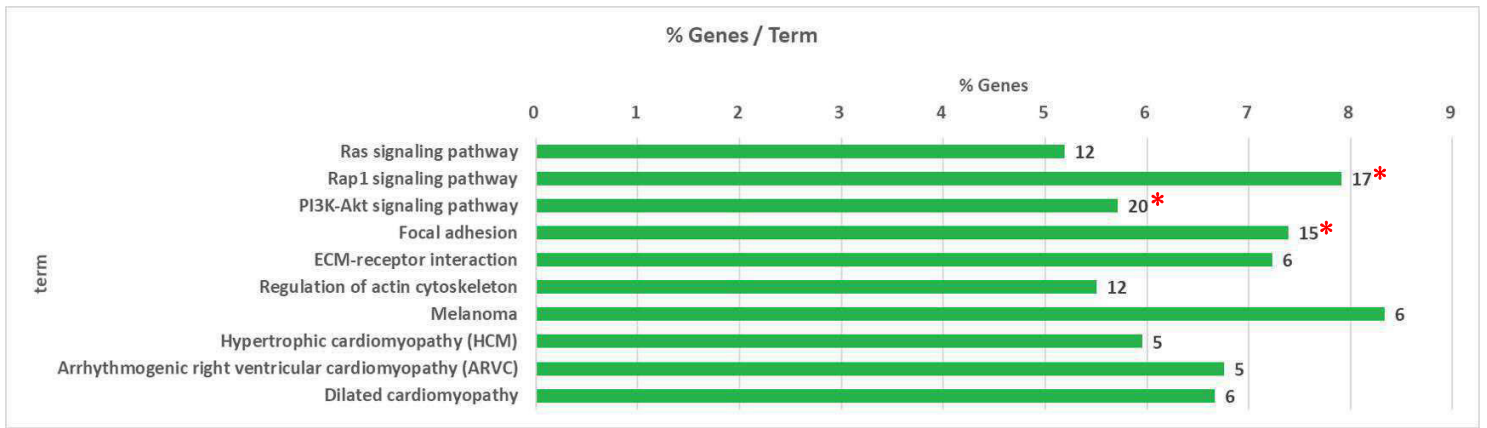

**Figure S2**



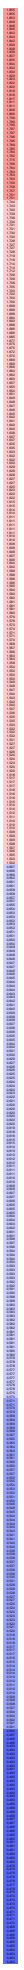



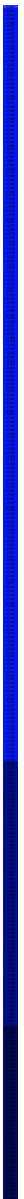



| cell differentiation | cell proliferation | extracellular matrix | BMP signaling pathway | calcium ion binding | calcium mediated signaling | cartilage development | growth factor binding | MAPK cascade  | notch signaling pathway | vasculature development | wnt signaling pathway | cell adhesion   | cell association | growth factor activity | ossification  | skeletal system development |
|----------------------|--------------------|----------------------|-----------------------|---------------------|----------------------------|-----------------------|-----------------------|---------------|-------------------------|-------------------------|-----------------------|-----------------|------------------|------------------------|---------------|-----------------------------|
| Mfrp<br>4.749        | Sox2<br>4.680      | Albig<br>4.932       | Bmp8a<br>4.764        | Calr5<br>4.990      | Jph2<br>4.926              | Bmp8a<br>4.746        | Scnf5a<br>4.664       | Ngp1<br>4.408 | Hes7<br>4.420           | App1<br>4.522           | Wnt10a<br>4.404       | Nxk2-3<br>4.482 | Nxk2-3<br>4.482  | Fgf11<br>4.806         | Atng<br>4.794 | Bmp8a<br>4.746              |
| Tiad2<br>3.916       | Fam68a<br>3.699    | Rarg2<br>3.586       | Bmp2<br>3.586         | Calr6<br>3.697      | Rarg2<br>3.586             | Sox2<br>3.646         | Scnf5a<br>4.664       | Pyg2<br>3.992 | Jag2<br>3.992           | Exor<br>3.992           | Wnt6<br>3.992         | Nxk2-3<br>4.482 | Nxk2-3<br>4.482  | Bmp8a<br>4.746         | Atng<br>4.794 | Bmp8a<br>4.746              |
| H2-Dm1a<br>4.444     | Fam68a<br>3.699    | Rarg2<br>3.586       | Bmp2<br>3.586         | Calr6<br>3.697      | Rarg2<br>3.586             | Sox2<br>3.646         | Scnf5a<br>4.664       | Mpg2<br>3.699 | Notch4<br>3.699         | Exor<br>3.992           | Wnt6<br>3.992         | Nxk2-3<br>4.482 | Nxk2-3<br>4.482  | Bmp8a<br>4.746         | Atng<br>4.794 | Bmp8a<br>4.746              |
| Ect1<br>4.197        | Trop2<br>4.444     | Wnt9a<br>4.444       | Bmp2<br>3.586         | Calr6<br>3.697      | Rarg2<br>3.586             | Sox2<br>3.646         | Scnf5a<br>4.664       | Mpg2<br>3.699 | Notch4<br>3.699         | Exor<br>3.992           | Wnt6<br>3.992         | Nxk2-3<br>4.482 | Nxk2-3<br>4.482  | Bmp8a<br>4.746         | Atng<br>4.794 | Bmp8a<br>4.746              |
| Lnc55<br>4.749       | Tgfb<br>4.582      | Wnt9a<br>4.444       | Bmp2<br>3.586         | Calr6<br>3.697      | Rarg2<br>3.586             | Sox2<br>3.646         | Scnf5a<br>4.664       | Mpg2<br>3.699 | Notch4<br>3.699         | Exor<br>3.992           | Wnt6<br>3.992         | Nxk2-3<br>4.482 | Nxk2-3<br>4.482  | Bmp8a<br>4.746         | Atng<br>4.794 | Bmp8a<br>4.746              |
| Cxcl1<br>4.618       | Mmp11<br>3.916     | Emp2<br>3.916        | Bmp2<br>3.586         | Calr6<br>3.697      | Rarg2<br>3.586             | Sox2<br>3.646         | Scnf5a<br>4.664       | Mpg2<br>3.699 | Notch4<br>3.699         | Exor<br>3.992           | Wnt6<br>3.992         | Nxk2-3<br>4.482 | Nxk2-3<br>4.482  | Bmp8a<br>4.746         | Atng<br>4.794 | Bmp8a<br>4.746              |
| Wnt9a<br>4.618       | Cb1<br>1.946       | Lmn1<br>1.946        | Bmp2<br>3.586         | Calr6<br>3.697      | Rarg2<br>3.586             | Sox2<br>3.646         | Scnf5a<br>4.664       | Mpg2<br>3.699 | Notch4<br>3.699         | Exor<br>3.992           | Wnt6<br>3.992         | Nxk2-3<br>4.482 | Nxk2-3<br>4.482  | Bmp8a<br>4.746         | Atng<br>4.794 | Bmp8a<br>4.746              |
| Crysp1<br>4.088      | Matt1<br>2.064     | Tgfb1<br>2.064       | Bmp2<br>3.586         | Calr6<br>3.697      | Rarg2<br>3.586             | Sox2<br>3.646         | Scnf5a<br>4.664       | Mpg2<br>3.699 | Notch4<br>3.699         | Exor<br>3.992           | Wnt6<br>3.992         | Nxk2-3<br>4.482 | Nxk2-3<br>4.482  | Bmp8a<br>4.746         | Atng<br>4.794 | Bmp8a<br>4.746              |
| Mrfg<br>4.131        | Pdgfrb<br>1.708    | Adam44<br>2.320      | Bmp2<br>3.586         | Calr6<br>3.697      | Rarg2<br>3.586             | Sox2<br>3.646         | Scnf5a<br>4.664       | Mpg2<br>3.699 | Notch4<br>3.699         | Exor<br>3.992           | Wnt6<br>3.992         | Nxk2-3<br>4.482 | Nxk2-3<br>4.482  | Bmp8a<br>4.746         | Atng<br>4.794 | Bmp8a<br>4.746              |
| Gm73<br>4.138        | Gm73<br>4.138      | Mmp11<br>3.916       | Bmp2<br>3.586         | Calr6<br>3.697      | Rarg2<br>3.586             | Sox2<br>3.646         | Scnf5a<br>4.664       | Mpg2<br>3.699 | Notch4<br>3.699         | Exor<br>3.992           | Wnt6<br>3.992         | Nxk2-3<br>4.482 | Nxk2-3<br>4.482  | Bmp8a<br>4.746         | Atng<br>4.794 | Bmp8a<br>4.746              |
| Sfrp1<br>4.148       | Abcb1a<br>1.672    | Wnt9a<br>4.444       | Bmp2<br>3.586         | Calr6<br>3.697      | Rarg2<br>3.586             | Sox2<br>3.646         | Scnf5a<br>4.664       | Mpg2<br>3.699 | Notch4<br>3.699         | Exor<br>3.992           | Wnt6<br>3.992         | Nxk2-3<br>4.482 | Nxk2-3<br>4.482  | Bmp8a<br>4.746         | Atng<br>4.794 | Bmp8a<br>4.746              |
| Gm1<br>4.093         | Aim2<br>1.538      | Mmp15<br>1.670       | Bmp2<br>3.586         | Calr6<br>3.697      | Rarg2<br>3.586             | Sox2<br>3.646         | Scnf5a<br>4.664       | Mpg2<br>3.699 | Notch4<br>3.699         | Exor<br>3.992           | Wnt6<br>3.992         | Nxk2-3<br>4.482 | Nxk2-3<br>4.482  | Bmp8a<br>4.746         | Atng<br>4.794 | Bmp8a<br>4.746              |
| Mmp2<br>3.545        | Imp2<br>1.533      | Rarb1<br>1.641       | Bmp2<br>3.586         | Calr6<br>3.697      | Rarg2<br>3.586             | Sox2<br>3.646         | Scnf5a<br>4.664       | Mpg2<br>3.699 | Notch4<br>3.699         | Exor<br>3.992           | Wnt6<br>3.992         | Nxk2-3<br>4.482 | Nxk2-3<br>4.482  | Bmp8a<br>4.746         | Atng<br>4.794 | Bmp8a<br>4.746              |
| Klf2<br>3.374        | Bok<br>1.517       | Pdzr1<br>1.517       | Bmp2<br>3.586         | Calr6<br>3.697      | Rarg2<br>3.586             | Sox2<br>3.646         | Scnf5a<br>4.664       | Mpg2<br>3.699 | Notch4<br>3.699         | Exor<br>3.992           | Wnt6<br>3.992         | Nxk2-3<br>4.482 | Nxk2-3<br>4.482  | Bmp8a<br>4.746         | Atng<br>4.794 | Bmp8a<br>4.746              |
| Trid4<br>3.355       | Npr3<br>0.620      | Mmp1a<br>0.620       | Bmp2<br>3.586         | Calr6<br>3.697      | Rarg2<br>3.586             | Sox2<br>3.646         | Scnf5a<br>4.664       | Mpg2<br>3.699 | Notch4<br>3.699         | Exor<br>3.992           | Wnt6<br>3.992         | Nxk2-3<br>4.482 | Nxk2-3<br>4.482  | Bmp8a<br>4.746         | Atng<br>4.794 | Bmp8a<br>4.746              |
| Pgf<br>3.331         | Cor1<br>0.620      | Col2a2<br>0.620      | Bmp2<br>3.586         | Calr6<br>3.697      | Rarg2<br>3.586             | Sox2<br>3.646         | Scnf5a<br>4.664       | Mpg2<br>3.699 | Notch4<br>3.699         | Exor<br>3.992           | Wnt6<br>3.992         | Nxk2-3<br>4.482 | Nxk2-3<br>4.482  | Bmp8a<br>4.746         | Atng<br>4.794 | Bmp8a<br>4.746              |
| Mov101<br>3.331      | Cor1<br>0.620      | Col2a2<br>0.620      | Bmp2<br>3.586         | Calr6<br>3.697      | Rarg2<br>3.586             | Sox2<br>3.646         | Scnf5a<br>4.664       | Mpg2<br>3.699 | Notch4<br>3.699         | Exor<br>3.992           | Wnt6<br>3.992         | Nxk2-3<br>4.482 | Nxk2-3<br>4.482  | Bmp8a<br>4.746         | Atng<br>4.794 | Bmp8a<br>4.746              |
| Osip1<br>3.036       | Das1<br>0.490      | Wnt9a<br>4.444       | Bmp2<br>3.586         | Calr6<br>3.697      | Rarg2<br>3.586             | Sox2<br>3.646         | Scnf5a<br>4.664       | Mpg2<br>3.699 | Notch4<br>3.699         | Exor<br>3.992           | Wnt6<br>3.992         | Nxk2-3<br>4.482 | Nxk2-3<br>4.482  | Bmp8a<br>4.746         | Atng<br>4.794 | Bmp8a<br>4.746              |
| Catpdr<br>2.881      | Col2a2<br>0.620    | Mmp8<br>0.620        | Bmp2<br>3.586         | Calr6<br>3.697      | Rarg2<br>3.586             | Sox2<br>3.646         | Scnf5a<br>4.664       | Mpg2<br>3.699 | Notch4<br>3.699         | Exor<br>3.992           | Wnt6<br>3.992         | Nxk2-3<br>4.482 | Nxk2-3<br>4.482  | Bmp8a<br>4.746         | Atng<br>4.794 | Bmp8a<br>4.746              |
| Mmp1<br>2.858        | Mmp1<br>2.858      | Mmp1<br>2.858        | Bmp2<br>3.586         | Calr6<br>3.697      | Rarg2<br>3.586             | Sox2<br>3.646         | Scnf5a<br>4.664       | Mpg2<br>3.699 | Notch4<br>3.699         | Exor<br>3.992           | Wnt6<br>3.992         | Nxk2-3<br>4.482 | Nxk2-3<br>4.482  | Bmp8a<br>4.746         | Atng<br>4.794 | Bmp8a<br>4.746              |
| Fgg<br>2.833         | Tack<br>0.447      | Col4a4<br>0.447      | Bmp2<br>3.586         | Calr6<br>3.697      | Rarg2<br>3.586             | Sox2<br>3.646         | Scnf5a<br>4.664       | Mpg2<br>3.699 | Notch4<br>3.699         | Exor<br>3.992           | Wnt6<br>3.992         | Nxk2-3<br>4.482 | Nxk2-3<br>4.482  | Bmp8a<br>4.746         | Atng<br>4.794 | Bmp8a<br>4.746              |
| Mmp1<br>2.833        | Kam<br>0.436       | Col4a4<br>0.436      | Bmp2<br>3.586         | Calr6<br>3.697      | Rarg2<br>3.586             | Sox2<br>3.646         | Scnf5a<br>4.664       | Mpg2<br>3.699 | Notch4<br>3.699         | Exor<br>3.992           | Wnt6<br>3.992         | Nxk2-3<br>4.482 | Nxk2-3<br>4.482  | Bmp8a<br>4.746         | Atng<br>4.794 | Bmp8a<br>4.746              |
| Tgfb<br>2.804        | Term4<br>0.418     | Wt<br>0.418          | Bmp2<br>3.586         | Calr6<br>3.697      | Rarg2<br>3.586             | Sox2<br>3.646         | Scnf5a<br>4.664       | Mpg2<br>3.699 | Notch4<br>3.699         | Exor<br>3.992           | Wnt6<br>3.992         | Nxk2-3<br>4.482 | Nxk2-3<br>4.482  | Bmp8a<br>4.746         | Atng<br>4.794 | Bmp8a<br>4.746              |
| Sox1<br>2.722        | Mcom<br>0.406      | Mmp13<br>0.406       | Bmp2<br>3.586         | Calr6<br>3.697      | Rarg2<br>3.586             | Sox2<br>3.646         | Scnf5a<br>4.664       | Mpg2<br>3.699 | Notch4<br>3.699         | Exor<br>3.992           | Wnt6<br>3.992         | Nxk2-3<br>4.482 | Nxk2-3<br>4.482  | Bmp8a<br>4.746         | Atng<br>4.794 | Bmp8a<br>4.746              |
| Selmp1<br>2.556      | Es1<br>0.384       | Wnt3<br>0.384        | Bmp2<br>3.586         | Calr6<br>3.697      | Rarg2<br>3.586             | Sox2<br>3.646         | Scnf5a<br>4.664       | Mpg2<br>3.699 | Notch4<br>3.699         | Exor<br>3.992           | Wnt6<br>3.992         | Nxk2-3<br>4.482 | Nxk2-3<br>4.482  | Bmp8a<br>4.746         | Atng<br>4.794 | Bmp8a<br>4.746              |
| Sox1<br>2.443        | Lnc17<br>0.376     | Mmp16<br>0.376       | Bmp2<br>3.586         | Calr6<br>3.697      | Rarg2<br>3.586             | Sox2<br>3.646         | Scnf5a<br>4.664       | Mpg2<br>3.699 | Notch4<br>3.699         | Exor<br>3.992           | Wnt6<br>3.992         | Nxk2-3<br>4.482 | Nxk2-3<br>4.482  | Bmp8a<br>4.746         | Atng<br>4.794 | Bmp8a<br>4.746              |
| Spry1<br>2.389       | Lgt3<br>0.364      | Evan<br>0.364        | Bmp2<br>3.586         | Calr6<br>3.697      | Rarg2<br>3.586             | Sox2<br>3.646         | Scnf5a<br>4.664       | Mpg2<br>3.699 | Notch4<br>3.699         | Exor<br>3.992           | Wnt6<br>3.992         | Nxk2-3<br>4.482 | Nxk2-3<br>4.482  | Bmp8a<br>4.746         | Atng<br>4.794 | Bmp8a<br>4.746              |
| Chrd<br>2.387        | Trm7<br>0.356      | Dmrt1<br>0.356       | Bmp2<br>3.586         | Calr6<br>3.697      | Rarg2<br>3.586             | Sox2<br>3.646         | Scnf5a<br>4.664       | Mpg2<br>3.699 | Notch4<br>3.699         | Exor<br>3.992           | Wnt6<br>3.992         | Nxk2-3<br>4.482 | Nxk2-3<br>4.482  | Bmp8a<br>4.746         | Atng<br>4.794 | Bmp8a<br>4.746              |
| Adam44<br>2.360      | Wnt4<br>0.350      | Emp1<br>0.350        | Bmp2<br>3.586         | Calr6<br>3.697      | Rarg2<br>3.586             | Sox2<br>3.646         | Scnf5a<br>4.664       | Mpg2<br>3.699 | Notch4<br>3.699         | Exor<br>3.992           | Wnt6<br>3.992         | Nxk2-3<br>4.482 | Nxk2-3<br>4.482  | Bmp8a<br>4.746         | Atng<br>4.794 | Bmp8a<br>4.746              |
| Mmp12<br>2.338       | P2ry7<br>0.307     | Cannt1b<br>0.307     | Bmp2<br>3.586         | Calr6<br>3.697      | Rarg2<br>3.586             | Sox2<br>3.646         | Scnf5a<br>4.664       | Mpg2<br>3.699 | Notch4<br>3.699         | Exor<br>3.992           | Wnt6<br>3.992         | Nxk2-3<br>4.482 | Nxk2-3<br>4.482  | Bmp8a<br>4.746         | Atng<br>4.794 | Bmp8a<br>4.746              |
| Mmp1<br>2.271        | Acnt1c<br>0.305    | Emp12<br>0.305       | Bmp2<br>3.586         | Calr6<br>3.697      | Rarg2<br>3.586             | Sox2<br>3.646         | Scnf5a<br>4.664       | Mpg2<br>3.699 | Notch4<br>3.699         | Exor<br>3.992           | Wnt6<br>3.992         | Nxk2-3<br>4.482 | Nxk2-3<br>4.482  | Bmp8a<br>4.746         | Atng<br>4.794 | Bmp8a<br>4.746              |
| Rarg1<br>2.191       | Eph1<br>0.312      | Cannt1<br>0.312      | Bmp2<br>3.586         | Calr6<br>3.697      | Rarg2<br>3.586             | Sox2<br>3.646         | Scnf5a<br>4.664       | Mpg2<br>3.699 | Notch4<br>3.699         | Exor<br>3.992           | Wnt6<br>3.992         | Nxk2-3<br>4.482 | Nxk2-3<br>4.482  | Bmp8a<br>4.746         | Atng<br>4.794 | Bmp8a<br>4.746              |
| App4<br>2.126        | Lef1<br>0.289      | Adam23<br>0.289      | Bmp2<br>3.586         | Calr6<br>3.697      | Rarg2<br>3.586             | Sox2<br>3.646         | Scnf5a<br>4.664       | Mpg2<br>3.699 | Notch4<br>3.699         | Exor<br>3.992           | Wnt6<br>3.992         | Nxk2-3<br>4.482 | Nxk2-3<br>4.482  | Bmp8a<br>4.746         | Atng<br>4.794 | Bmp8a<br>4.746              |
| Fem3<br>2.105        | Wnt3<br>0.286      | Adam23<br>0.286      | Bmp2<br>3.586         | Calr6<br>3.697      | Rarg2<br>3.586             | Sox2<br>3.646         | Scnf5a<br>4.664       | Mpg2<br>3.699 | Notch4<br>3.699         | Exor<br>3.992           | Wnt6<br>3.992         | Nxk2-3<br>4.482 | Nxk2-3<br>4.482  | Bmp8a<br>4.746         | Atng<br>4.794 | Bmp8a<br>4.746              |
| Prca<br>1.969        | Ros1<br>0.247      | Adam23<br>0.247      | Bmp2<br>3.586         | Calr6<br>3.697      | Rarg2<br>3.586             | Sox2<br>3.646         | Scnf5a<br>4.664       | Mpg2<br>3.699 | Notch4<br>3.699         | Exor<br>3.992           | Wnt6<br>3.992         | Nxk2-3<br>4.482 | Nxk2-3<br>4.482  | Bmp8a<br>4.746         | Atng<br>4.794 | Bmp8a<br>4.746              |
| Prca<br>1.969        | Ros1<br>0.247      | Adam23<br>0.247      | Bmp2<br>3.586         | Calr6<br>3.697      | Rarg2<br>3.586             | Sox2<br>3.646         | Scnf5a<br>4.664       | Mpg2<br>3.699 | Notch4<br>3.699         | Exor<br>3.992           | Wnt6<br>3.992         | Nxk2-3<br>4.482 | Nxk2-3<br>4.482  | Bmp8a<br>4.746         | Atng<br>4.794 | Bmp8a<br>4.746              |
| Ad44131<br>1.858     | Mmp15<br>0.230     | Adam23<br>0.230      | Bmp2<br>3.586         | Calr6<br>3.697      | Rarg2<br>3.586             | Sox2<br>3.646         | Scnf5a<br>4.664       | Mpg2<br>3.699 | Notch4<br>3.699         | Exor<br>3.992           | Wnt6<br>3.992         | Nxk2-3<br>4.482 | Nxk2-3<br>4.482  | Bmp8a<br>4.746         | Atng<br>4.794 | Bmp8a<br>4.746              |
| Lmn1<br>1.853        | C2<br>0.216        | Adam23<br>0.216      | Bmp2<br>3.586         | Calr6<br>3.697      | Rarg2<br>3.586             | Sox2<br>3.646         | Scnf5a<br>4.664       | Mpg2<br>3.699 | Notch4<br>3.699         | Exor<br>3.992           | Wnt6<br>3.992         | Nxk2-3<br>4.482 | Nxk2-3<br>4.482  | Bmp8a<br>4.746         | Atng<br>4.794 | Bmp8a<br>4.746              |
| Matt1<br>1.848       | Dmrt1<br>0.209     | Adam23<br>0.209      | Bmp2<br>3.586         | Calr6<br>3.697      | Rarg2<br>3.586             | Sox2<br>3.646         | Scnf5a<br>4.664       | Mpg2<br>3.699 | Notch4<br>3.699         | Exor<br>3.992           | Wnt6<br>3.992         | Nxk2-3<br>4.482 | Nxk2-3<br>4.482  | Bmp8a<br>4.746         | Atng<br>4.794 | Bmp8a<br>4.746              |
| Gm2<br>1.839         | Asn2<br>0.204      | Adam23<br>0.204      | Bmp2<br>3.586         | Calr6<br>3.697      | Rarg2<br>3.586             | Sox2<br>3.646         | Scnf5a<br>4.664       | Mpg2<br>3.699 | Notch4<br>3.699         | Exor<br>3.992           | Wnt6<br>3.992         | Nxk2-3<br>4.482 | Nxk2-3<br>4.482  | Bmp8a<br>4.746         | Atng<br>4.794 | Bmp8a<br>4.746              |
| Fach<br>1.745        | Dmrt2<br>0.195     | Adam23<br>0.195      | Bmp2<br>3.586         | Calr6<br>3.697      | Rarg2<br>3.586             | Sox2<br>3.646         | Scnf5a<br>4.664       | Mpg2<br>3.699 | Notch4<br>3.699         | Exor<br>3.992           | Wnt6<br>3.992         | Nxk2-3<br>4.482 | Nxk2-3<br>4.482  | Bmp8a<br>4.746         | Atng<br>4.794 | Bmp8a<br>4.746              |
| Rgk4<br>1.726        | Nkx1<br>0.191      | Adam23<br>0.191      | Bmp2<br>3.586         | Calr6<br>3.697      | Rarg2<br>3.586             | Sox2<br>3.646         | Scnf5a<br>4.664       | Mpg2<br>3.699 | Notch4<br>3.699         | Exor<br>3.992           | Wnt6<br>3.992         | Nxk2-3<br>4.482 | Nxk2-3<br>4.482  | Bmp8a<br>4.746         | Atng<br>4.794 | Bmp8a<br>4.746              |
| Wnt9a<br>1.662       | Sh3bp2a<br>0.183   | Adam23<br>0.183      | Bmp2<br>3.586         | Calr6<br>3.697      | Rarg2<br>3.586             | Sox2<br>3.646         | Scnf5a<br>4.664       | Mpg2<br>3.699 | Notch4<br>3.699         | Exor<br>3.992           | Wnt6<br>3.992         | Nxk2-3<br>4.482 | Nxk2-3<br>4.482  | Bmp8a<br>4.746         | Atng<br>4.794 | Bmp8a<br>4.746              |
| Mmp11<br>1.654       | Kzmf1<br>0.174     | Adam23<br>0.174      | Bmp2<br>3.586         | Calr6<br>3.697      | Rarg2<br>3.586             | Sox2<br>3.646         | Scnf5a<br>4.664       | Mpg2<br>3.699 | Notch4<br>3.699         | Exor<br>3.992           | Wnt6<br>3.992         | Nxk2-3<br>4.482 | Nxk2-3<br>4.     |                        |               |                             |
